# Supplementary material for: Switching to a ‘turn-on’ fluorescent probe for rapid detection of hydrazine in human breast cancer cells using a test-strip
Source: Royal Society of Chemistry journal article supplement (doi:10.1039/d2ay01157c), 2022-01-01
Supplement: d2ay01157c1.pdf [file d2ay01157c1.pdf]

## Switching to a 'Turn-on' fluorescent probe for rapid detection of hydrazine in human breast cancer cell and test-strip

Anirban Karak<sup>a</sup>, Moumi Mandal<sup>a</sup>, Satyajit Halder<sup>b</sup>, Shilpita Banerjee<sup>a</sup>, Depanjan Banik<sup>a</sup>,  
Anwasha Maiti<sup>a</sup>, Kuladip Jana<sup>b</sup>, Ajit Kumar Mahapatra<sup>a\*</sup>

<sup>a</sup>Department of Chemistry, Indian Institute of Engineering Science and Technology, Shibpur,  
Howrah 711 103, India

<sup>b</sup>Division of Molecular Medicine, Bose Institute, P 1/12, CIT Scheme VIIM, Kolkata 700054,  
India.

\*Author to whom correspondence should be addressed; electronic mail:

akmahapatra@chem.iiests.ac.in; Tel.: +91 – 9434508013

### Table of Contents

|                                                                                             |        |
|---------------------------------------------------------------------------------------------|--------|
| 1. Comparison table of previously reported hydrazine probe with our present work            | S2-S3  |
| 2. Absorption and emission spectral response of TPBT in the presence of hydrazine           | S3-S4  |
| 3. Bar diagram                                                                              | S4     |
| 4. Quantum chemical DFT method                                                              | S5     |
| 5. Determination of the Response time of probe towards the product                          | S6     |
| 6. Live Cellular imaging                                                                    | S6-S7  |
| 7. ESI-MS Spectra                                                                           | S7-S8  |
| 8. NMR Spectra: <sup>1</sup> H NMR, <sup>13</sup> C NMR                                     | S8-S10 |
| 9. Comparative fluorescence graph                                                           | S11    |
| 10. Effect of pH                                                                            | S11    |
| 10. Plot of fluorescence change of TPSBT and concentration of N <sub>2</sub> H <sub>4</sub> | S12    |
| 11. Calculation of detection limit                                                          | S12    |
| 12. Environmental water sample study                                                        | S13    |
| 13. References                                                                              | S13-14 |

**Table S1** Comparison between the previously reported hydrazine probe with our newly designed probe

| Structure of the probe                                                              | Solvent                             | Mode of sensing | Application                           | LOD                      | Response time | Ref |
|-------------------------------------------------------------------------------------|-------------------------------------|-----------------|---------------------------------------|--------------------------|---------------|-----|
| 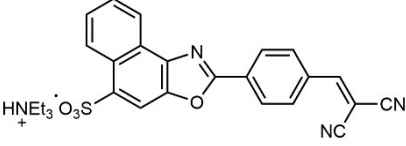   | PBS buffer                          | Blocked ICT     | Whatman paper strips                  | $1.79 \times 10^{-9}$ M  | 40 s          | 1   |
|    | Tris/HCl buffer                     |                 |                                       | 0.253 ppb                | 1 h           | 2   |
|   | CH <sub>3</sub> CN–HEPES (1:1, v/v) |                 | filter paper-based test strips        | $2.673 \times 10^{-6}$ M | 60 min        | 3   |
|  | DMSO/PBS buffer                     | Blocked ICT     | real water samples, live cell imaging | 0.09 $\mu$ M             | 1 h           | 4   |
|  | PBS–DMSO (v/v = 1/1)                | -               | real water samples, live cell imaging | 11.9 nM                  | 3 min         | 5   |
|  | DMSO/PBS buffer (4/6, v/v) m        | Blocked ICT     | real water samples, live cell imaging | 8.47 nM                  | 180 s         | 6   |

|                                                                                     |                                                               |                 |                                         |                         |        |          |
|-------------------------------------------------------------------------------------|---------------------------------------------------------------|-----------------|-----------------------------------------|-------------------------|--------|----------|
| 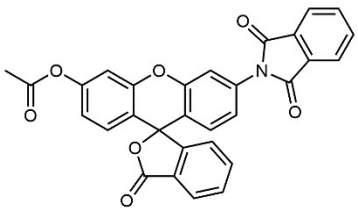   | DMSO-HEPES (1/1, v/v)                                         | ICT On, PET Off | live cell imaging                       | 1.83 ppb                | -      | 7        |
|    | DMSO/PBS                                                      | Blocked ICT     | live cell imaging                       | $5 \times 10^{-8}$ M    | 10 min | 8        |
|    | DMSO/PBS buffer (9/1, v/v) m                                  | -               | real water samples, live cell imaging   | 40.8 nM                 | 30 min | 9        |
|  | THF-H <sub>2</sub> O (4:6, v/v, 10 mM HEPES buffer, pH = 7.4) | Blocked ICT     | TLC based test strip, live cell imaging | $1.22 \times 10^{-7}$ M | 50 s   | Our work |

## 2. Absorption and emission spectral response of TPBT in the presence of hydrazine

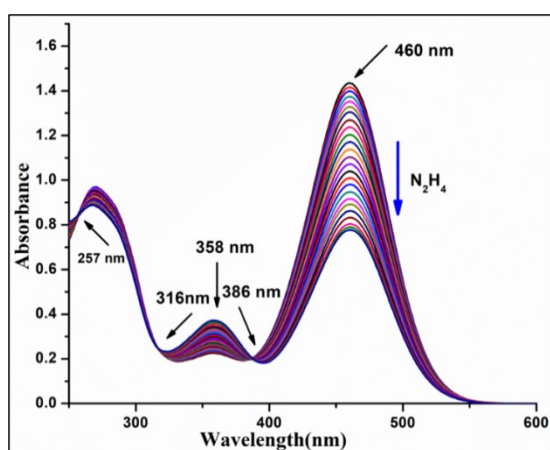

**Figure S1.** Absorption spectral data of the probe **TPBT** ( $4.0 \times 10^{-5}$  M) in aqueous THF solution (THF/H<sub>2</sub>O = 4:6 v/v, 10mM HEPES buffer, pH = 7.4), upon gradual addition of hydrazine ( $4.0 \times 10^{-4}$  M).

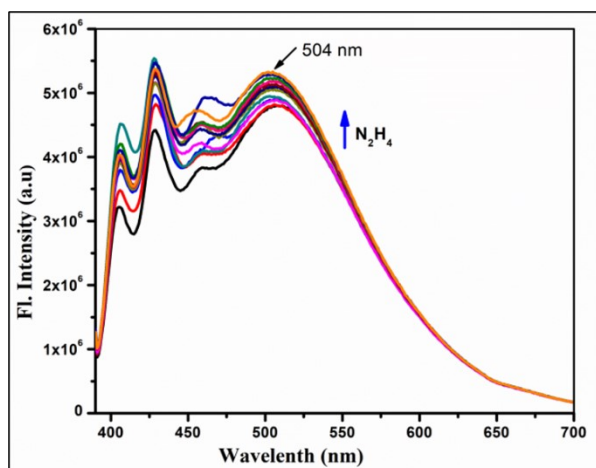

**Figure S2.** Emission spectral data of the probe **TPBT** ( $4.0 \times 10^{-5}$  M) in aqueous THF solution (THF/H<sub>2</sub>O =4:6 v/v, 10mM HEPES buffer, pH = 7.4) upon gradual addition of hydrazine ( $4.0 \times 10^{-4}$  M), (Excitation= 380 nm).

### 3. Bar diagram

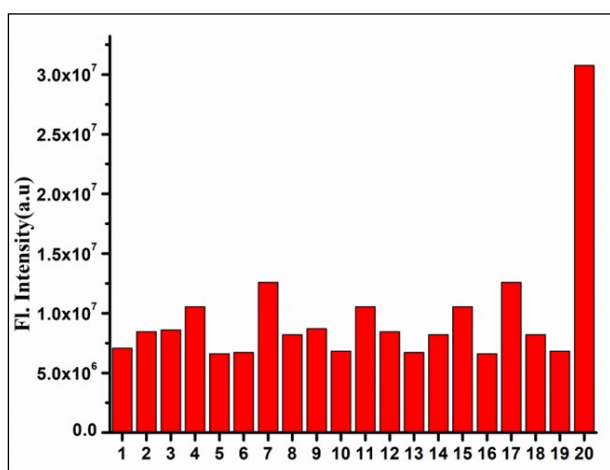

**Figure S3.** Change in emission in the selectivity study of the probe (40  $\mu$ M) in the presence of different analytes (75  $\mu$ M); where analytes are 1) Blank, 2) Cr<sup>3+</sup>, 3) Fe<sup>2+</sup>, 4) Na<sup>+</sup>, 5) Al<sup>3+</sup>, 6) Cu<sup>2+</sup>, 7) Hg<sup>2+</sup>, 8) Zn<sup>2+</sup>, 9) F<sup>-</sup>, 10) Cl<sup>-</sup>, 10) SCN<sup>-</sup>, 11) CN<sup>-</sup>, 12) CH<sub>3</sub>COO<sup>-</sup>, 13) OCl<sup>-</sup> 14) PA, 15) urea, 16) PhNHNH<sub>2</sub> 17) hydroxyl amine, 18) cysteine, 19) thiourea, 20) N<sub>2</sub>H<sub>4</sub>

#### 4. Theoretical calculations:

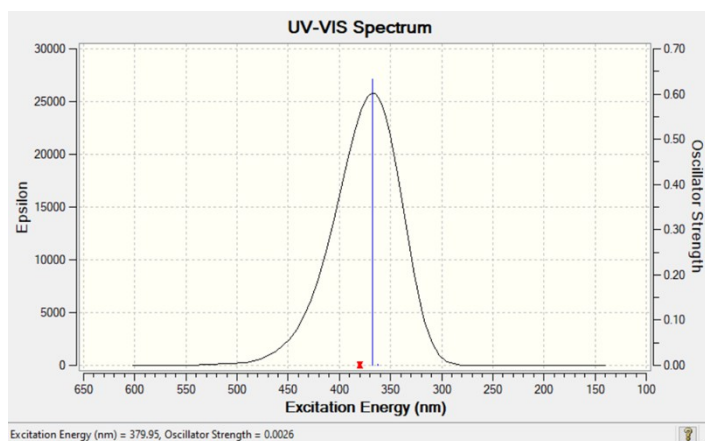

**Figure S4.** Absorption spectra of the Product (TPBT-N<sub>2</sub>H<sub>4</sub>)

**Table S2** The vertical main orbital transition of the TPBT-N<sub>2</sub>H<sub>4</sub> calculated by TDDFT method

| Energy (eV) | Wavelength (nm) | Osc. strength (f) | Transition         |
|-------------|-----------------|-------------------|--------------------|
| 3.1531      | 393.21          | 0.8516            | <b>HOMO→LUMO</b>   |
| 3.6081      | 343.62          | 0.0191            | <b>HOMO→LUMO+1</b> |
| 3.8266      | 324.00          | 0.2661            | <b>HOMO→LUMO+2</b> |

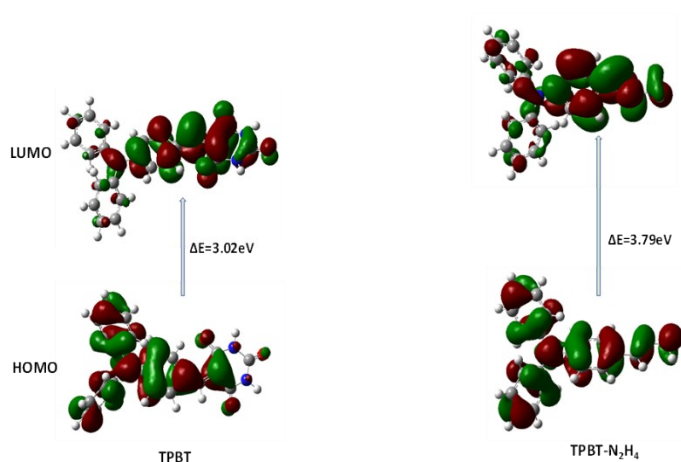

**Figure S5.** The frontier molecular orbitals of TPBT and TPBT-N<sub>2</sub>H<sub>4</sub> obtained at DFT level using B3LYP/6-31G+(d, p) basis set.

## 5. Determination of the response time of probe toward the product

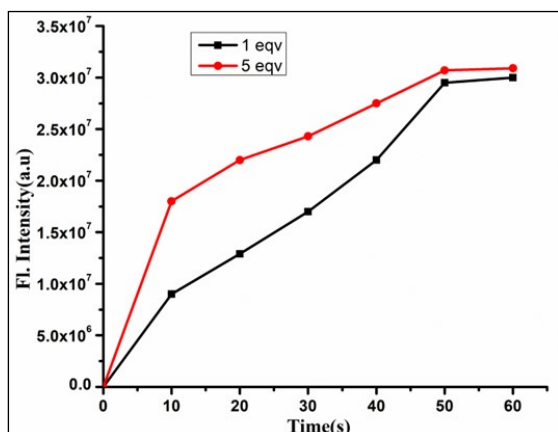

**Figure S6.** Time course (0–60 s) of fluorescence enhancement of **TPSBT** (10.0  $\mu\text{M}$ ) in THF- $\text{H}_2\text{O}$  solution upon addition of two different concentrations of hydrazine ( $\lambda_{\text{ex}} = 380 \text{ nm}$ ;  $\lambda_{\text{em}} = 511 \text{ nm}$ ).

## 6. Cell line study:

To envision the fluorescence ability of the ligand **TPSBT** in the presence of hydrazine fluorescence imaging was performed in cell line MDA-MB 231. Briefly, cells were grown in coverslips for 24 hrs. in a 37°C humidified incubator containing 5%  $\text{CO}_2$  and then pre-treated the cells with 10  $\mu\text{M}$  working concentration of hydrazine for the time period of 30 min and then washed with 1 $\times$ PBS to remove any unbound hydrazine present within the medium followed by 10  $\mu\text{M}$  working concentration **TPSBT** added and incubated for the time period of 15 min and 30 min in dark at 37°C and then washed with 1 $\times$ PBS two times to remove any unbound **TPSBT** or **hydrazine** and then they were mounted on a glass slide and detected under fluorescence microscope (Olympus).

## Cytotoxicity assay:

MTT cell proliferation assay<sup>10,11</sup> was performed to assess the cytotoxic effect of the ligand **TPSBT** in both the cancer cell line MDA-MB-231 and normal cell line NKE. In brief, cells were first seeded in 96-well plates at a concentration of  $1 \times 10^4$  cells per well for 24 h and exposed to the different working concentrations of ligand **TPSBT** (0  $\mu\text{M}$ , 10  $\mu\text{M}$ , 20  $\mu\text{M}$ , 40  $\mu\text{M}$ , 80  $\mu\text{M}$ , 100  $\mu\text{M}$ ) for 24 hrs. After incubation cells were washed with 1 $\times$ PBS and MTT solution (0.5 mg/ml) were added to each well and incubated for 4 h and the resulting formazan crystals were dissolved in DMSO and the absorbance was measured at 570 nm by using a

microplate reader. Cell viability was expressed as a percentage of the control experimental setup.

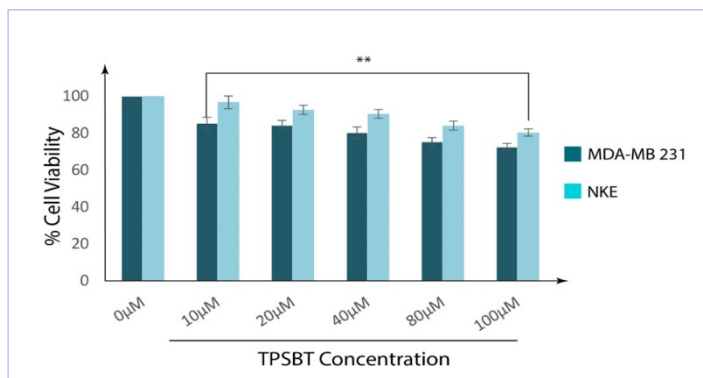

**Figure S7:** Cell survivability of MDA-MB 231 and NKE cells exposed to different ligand TPSBT concentrations. Data are representative of at least three independent experiments and bar graph shows mean  $\pm$  SEM,  $**p < 0.001$  were interpreted as statistically significant, as compared with the control.

## 7. ESI-MS Spectra

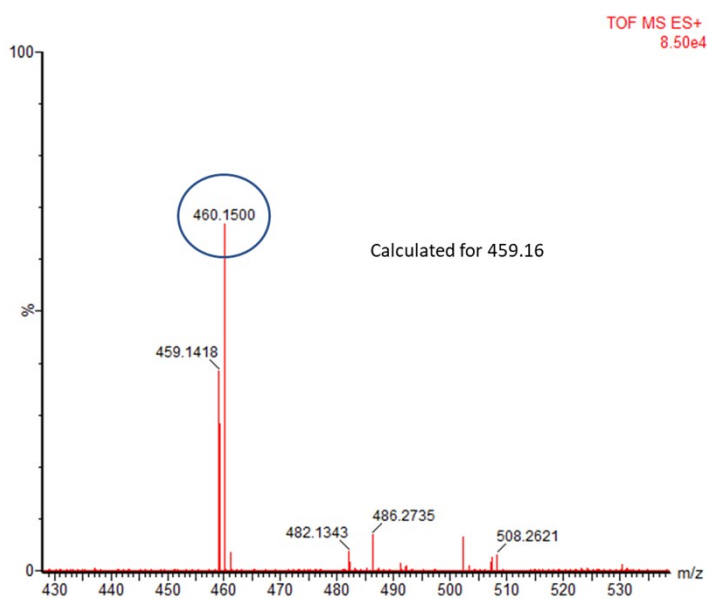

**Figure S8:** HRMS of the probe TPSBT

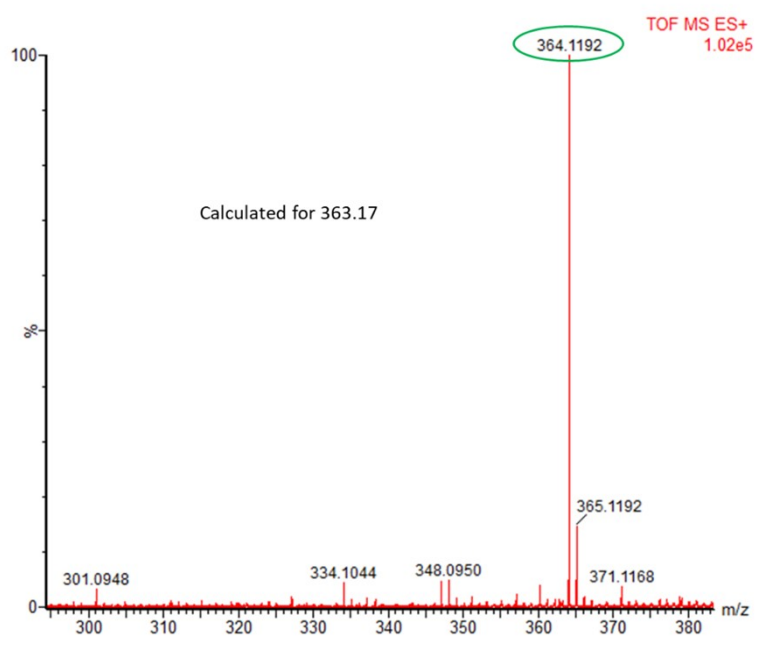

**Figure S9:** HRMS of the probe **TPSBT** +hydrazine adducts

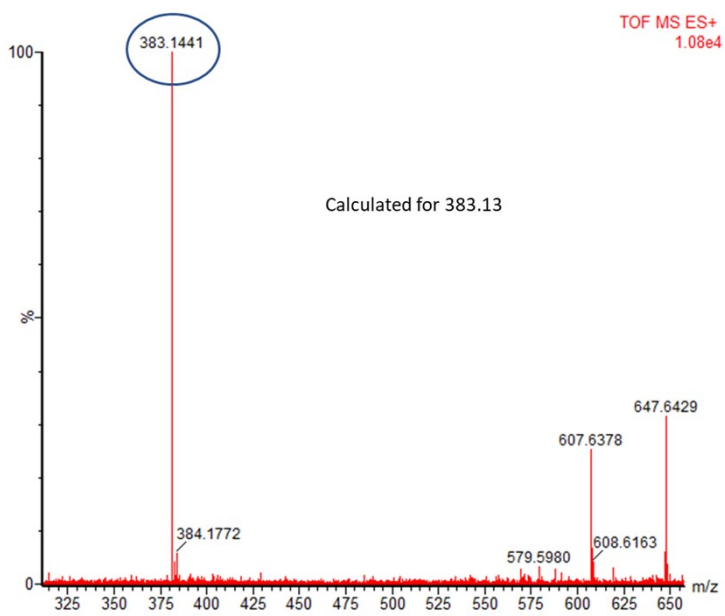

**Figure S10:** HRMS of the controlled compound **TPBT**



## 8. NMR Spectra: $^1\text{H}$ NMR, $^{13}\text{C}$ NMR

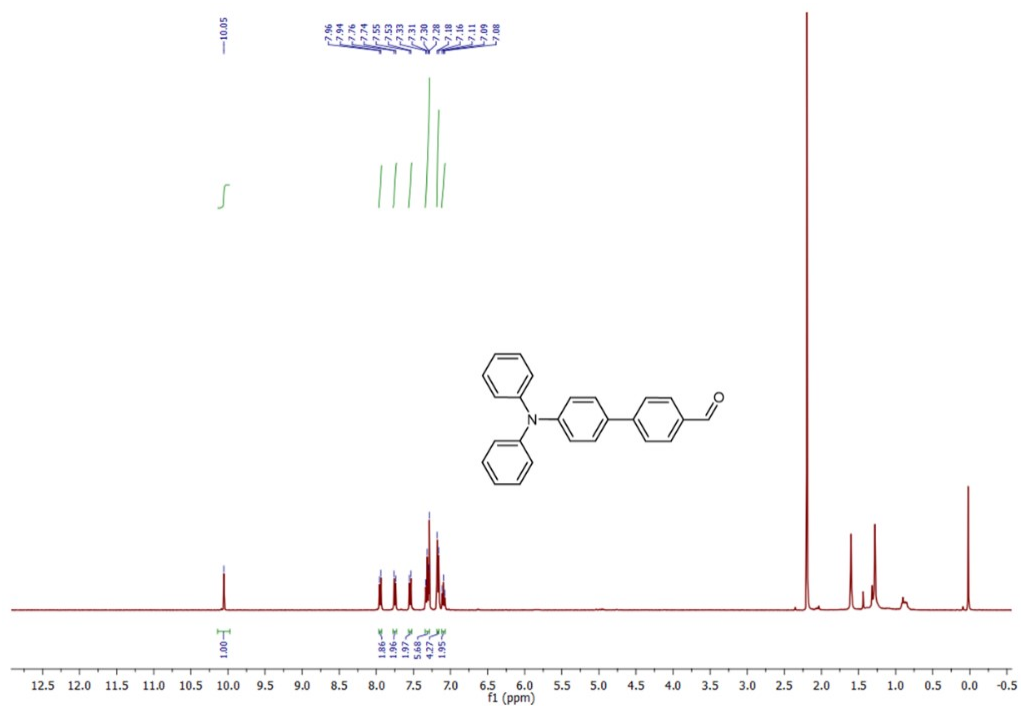

Figure S11:  $^1\text{H}$  NMR spectrum of the Compound 2

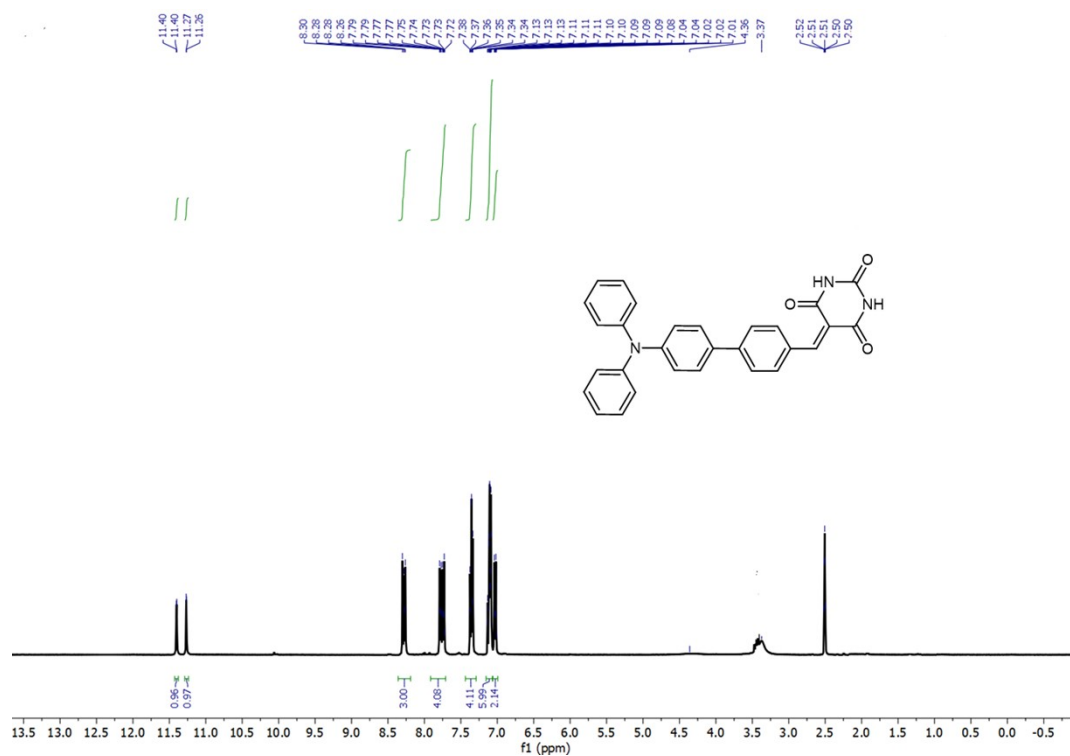

Figure S12:  $^1\text{H}$  NMR spectrum of the probe TPSBT in  $\text{DMSO}-d_6$

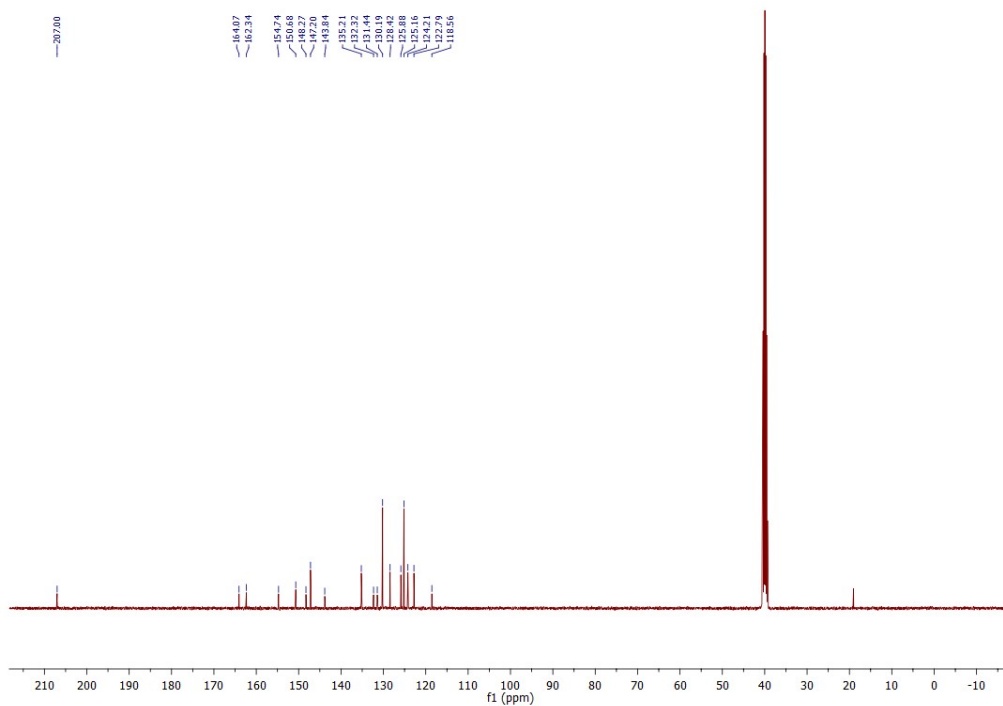

Figure S13:  $^{13}\text{C}$  NMR of the probe **TPSBT** in  $\text{DMSO } d_6$

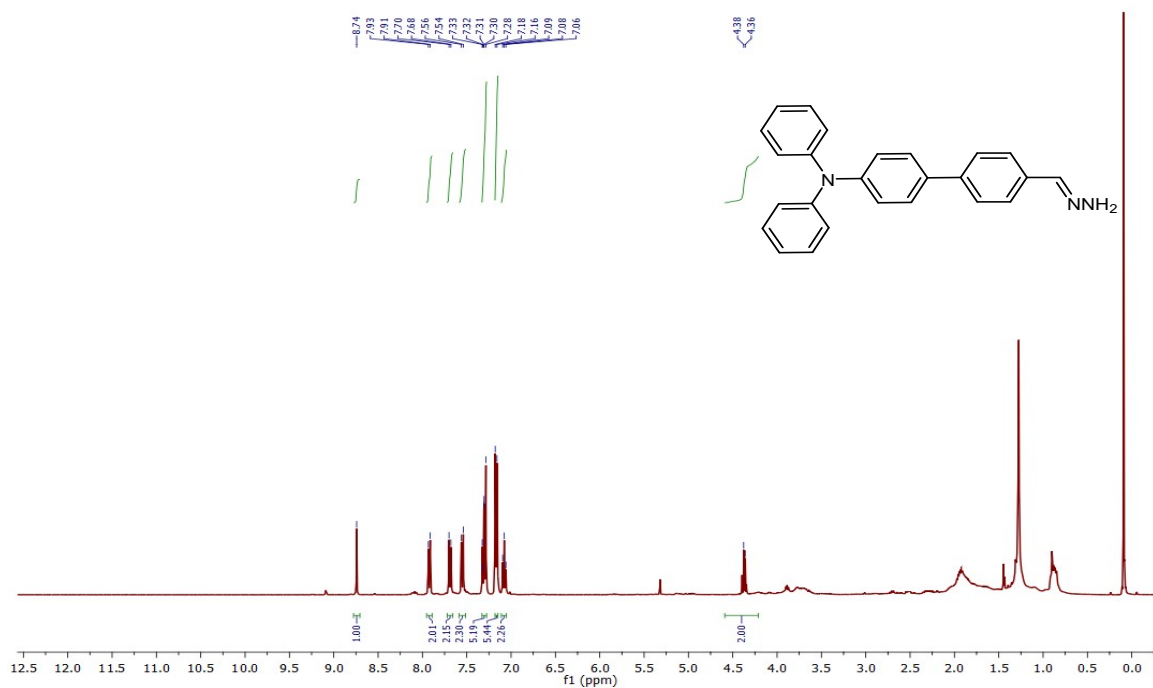

Figure S14:  $^1\text{H}$  NMR spectrum of the probe **TPSBT- $\text{N}_2\text{H}_4$**  adduct in  $\text{CDCl}_3$

## 9. Comparative fluorescence graph

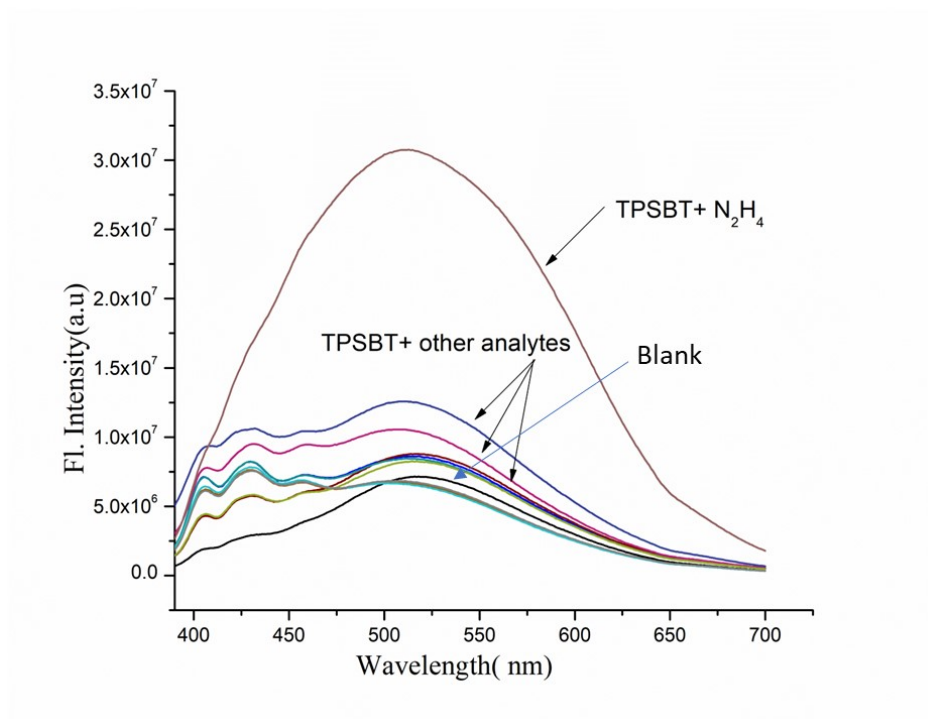

**Figure S15:** Comparative graph of change in fluorescence of TPSBT in presence of hydrazine and other analytes.

## 10. Effect of pH

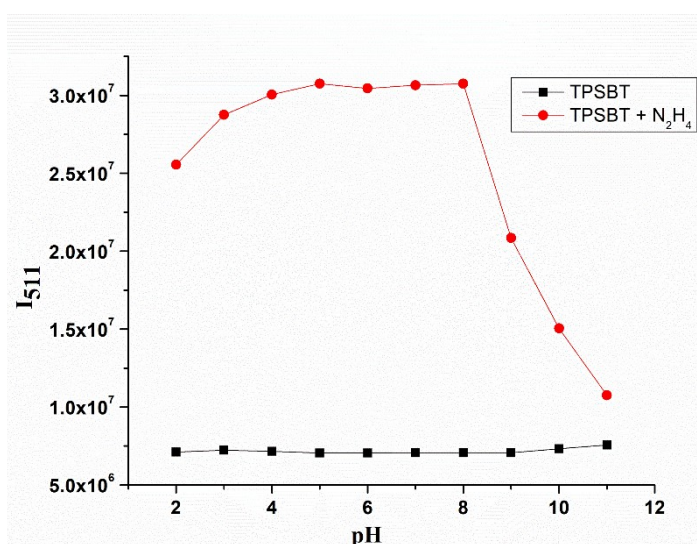

**Figure S16:** Effect of pH on fluorescence of TPSBT and TPSBT+  $N_2H_4$  in THF- $H_2O$  at 511 nm

## 11. Plot of fluorescence change of TPSBT and concentration of $N_2H_4$

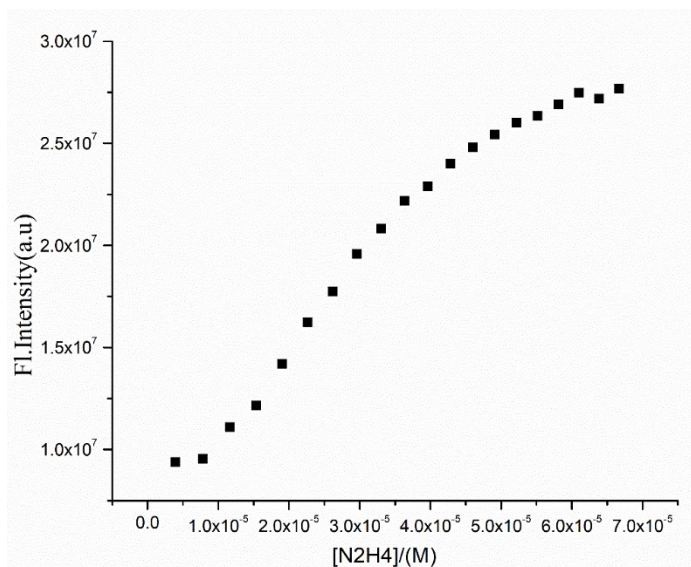

**Figure S17:** Plot of fluorescence change of TPSBT and concentration of  $N_2H_4$

## 12. Calculation of detection Limit

The limit of detection (LOD) of TPSBT for hydrazine was calculated using the general equation  $LOD = K \times \delta/m$

Where  $K = 2$  or  $3$  (we take  $2$  in this case) and  $\delta$  is the standard deviation of the blank solution and  $m$  is the slope of the calibration curve.

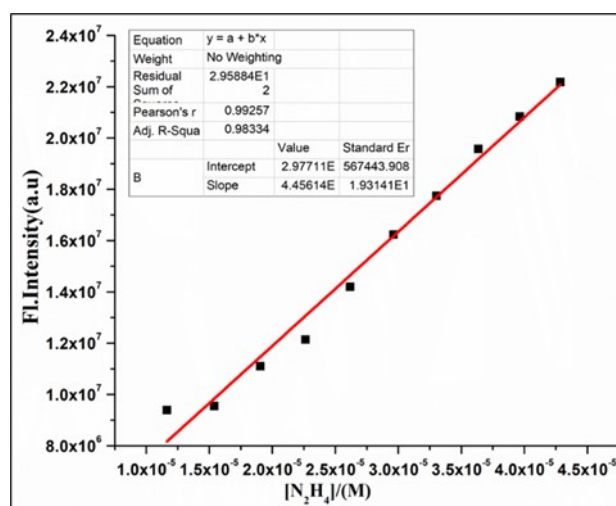

**Figure S18:** From the graph, we get slope ( $m$ ) =  $4.45 \times 10^{11}$ , thus using the formula we obtained the detection limit of  $1.22 \times 10^{-7}$  M.

**Table S3** Environmental water sample study

| Samples            | N <sub>2</sub> H <sub>4</sub> spiked (M) | N <sub>2</sub> H <sub>4</sub> recovered (M) | Recovery (%) |
|--------------------|------------------------------------------|---------------------------------------------|--------------|
| Tap water          | 0                                        | not detected                                | —            |
|                    | $2 \times 10^{-7}$                       | $(1.97 \pm 0.05) \times 10^{-7}$            | 98.5         |
|                    | $2 \times 10^{-6}$                       | $(2.02 \pm 0.15) \times 10^{-6}$            | 101          |
|                    | $2 \times 10^{-5}$                       | $(1.94 \pm 0.12) \times 10^{-5}$            | 97           |
| Ganges River water | 0                                        | not detected                                | —            |
|                    | $2 \times 10^{-7}$                       | $(1.91 \pm 0.14) \times 10^{-7}$            | 95.5         |
|                    | $2 \times 10^{-6}$                       | $(2.09 \pm 0.13) \times 10^{-6}$            | 104.5        |
|                    | $2 \times 10^{-5}$                       | $(1.98 \pm 0.10) \times 10^{-5}$            | 99           |
| Lake water         | 0                                        | not detected                                | —            |
|                    | $2 \times 10^{-7}$                       | $(2.08 \pm 0.16) \times 10^{-7}$            | 104          |
|                    | $2 \times 10^{-6}$                       | $(2.03 \pm 0.11) \times 10^{-6}$            | 101.5        |
|                    | $2 \times 10^{-5}$                       | $(1.99 \pm 0.11) \times 10^{-5}$            | 99.5         |

### 13. References

1. Shweta, A. Kumar, Neeraj, S. K. Asthana, A. Prakash, J. K. Roy, I. Tiwari, and K. K. Upadhyaya, *RSC Adv.*, 2016, **6**, 94959-94966.
2. L. Liu, Y. Le, M. Teng, Z. Zhou, D. Zhang, C. Zhao and J. Cao, *Dyes and Pigments*, 2018, **151**, 1-6.
3. W. D. Wang, Y. Hu, Q. Li, and S. L. Hu, *Inorg. Chim. Acta*, 2018, **477**, 206-211.
4. C. Wu, R. Xie, X. Pang, Y. Li, Z. Zhou, and H. Li, *Spectrochim. Acta - A: Mol. Biomol. Spectrosc.*, 2020, **243**, 118764.
5. S. H. Guo, Z. Q. Guo, C. Y. Wang, Y. Shen and W. H. Zhu, *Tetrahedron*, 2019, **75**, 2642-2646.
6. X. Wang, G. Ding, Y. Wang, S. Mao, K. Wang, Z. Ge, Y. Zhang, X. Li, and C. H. Hung, *Tetrahedron*, 2020, **76**, 131726.
7. W. Xu, W. Liu, T. Zhou, Y. Yang, and W. Li, *J. Photochem. Photobiol. A: Chem.*, 2018, **356**, 610–616.
8. J. Du, X. Li, S. Ruan, Y. Li, F. Ren, Y. Cao, X. Wang, Y. Zhang, S. Wu and J. Li, *Analyst*, 2020, **145**, 636-642.
9. H. Wu, W. Zhang, Y. Wu, N. Liu, F. Meng, Y. Xie, and L. Yan, *Microchem. J.*, 2020, **159**, 105461.
10. P. R. Twentyman and M. A Luscomb *Br. J. Cancer*, 1987, **56**, 279–285.

11. S. K. Vemuri, S. Halder, R. R. Banala, H. K. Rachamalla, V. M. Devraj, C. S. Mallarpu, U. K. Neerudu, R. Bodlapati, S. Mukherjee, S.G.P. Venkata, G. R. A.Venkata, M. Thakkumalai, K. Jana, *Int. J. Mol. Sci.*, 2022, **23**, 2150.
